# Supplementary material for: Photochemical deposition of Ag nanocrystals on hierarchical ZnO microspheres and their enhanced gas-sensing properties
Source: Royal Society of Chemistry journal article supplement (doi:10.1039/c1ce06041d), 2011-11-10
Supplement: c1ce06041d.pdf [file c1ce06041d.pdf]

Electronic Supplementary Information (ESI) for

## Photochemical Deposition of Ag Nanocrystals on Hierarchical ZnO Microspheres and Their Enhanced Gas-sensing Properties

Guoxing Zhu,<sup>a</sup> Yuanjun Liu,<sup>b</sup> Huan Xu,<sup>a</sup> Yu Chen,<sup>a</sup> Xiaoping Shen,<sup>\*,a</sup> and Zheng Xu<sup>c</sup>

<sup>a</sup>School of Chemistry and Chemical Engineering, Jiangsu University, Zhenjiang, 212013, China

<sup>b</sup>School of Biology and Chemical Engineering, Jiangsu University of Science and Technology,  
Zhenjiang, 212013, China

<sup>c</sup>School of Chemistry and Chemical Engineering, Nanjing University, Nanjing 210093, China

Corresponding author: Xiaoping Shen

Tel: (+)86-511-88791800; Fax: (+)86-511-88791800; E-mail: [xiaopingshen@163.com](mailto:xiaopingshen@163.com)

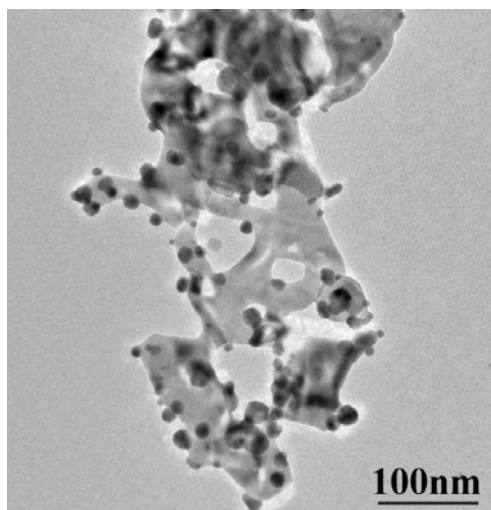

**Figure S1.** TEM image of Ag-ZnO-2-2h showing bigger Ag nanoparticles with average diameter of 11.3 nm loaded on ZnO.

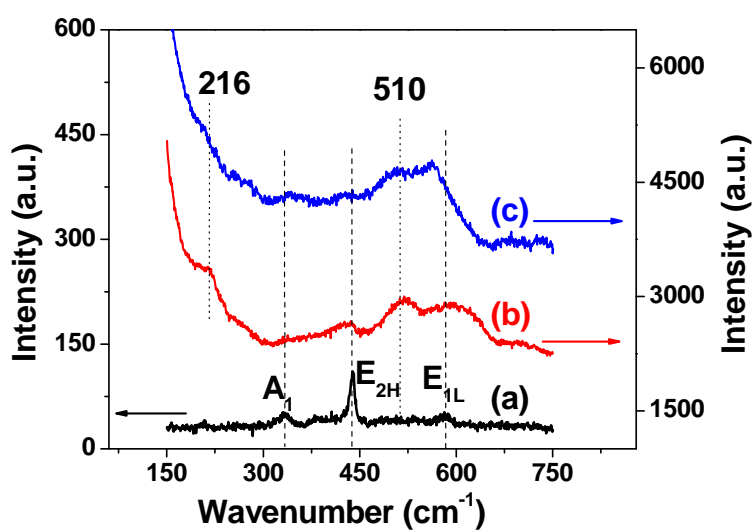

**Figure S2.** Raman spectra of the Ag-ZnO nanocomposites with different Ag loadings: (a) pure ZnO, (b) Ag-ZnO-1 with 2.4 wt% Ag, (c) Ag-ZnO-2 with 3.6 wt% Ag.

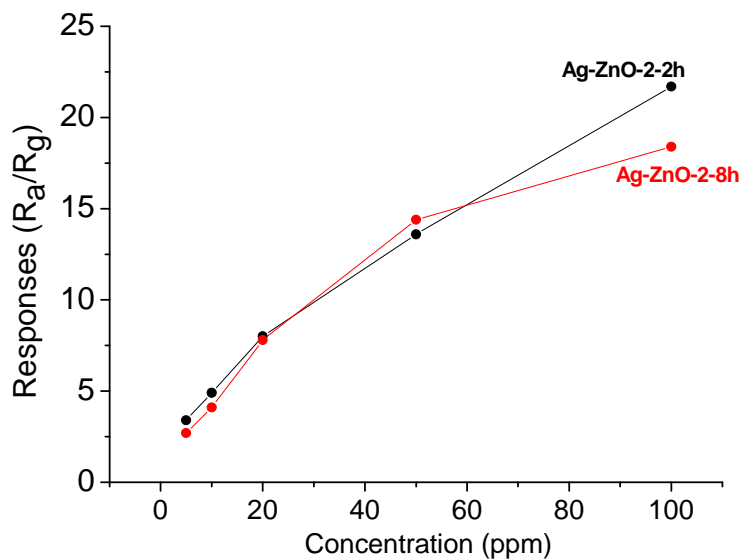

**Figure S3.** The gas concentration-dependent responses for the Ag-ZnO-2-2h and Ag-ZnO-2-8h sensors to ethanol operated at 350 °C.

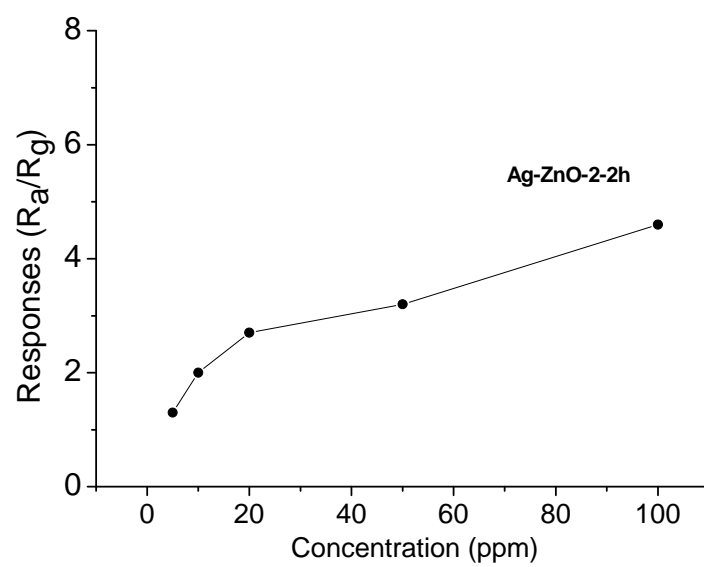

**Figure S4.** The gas concentration-dependent responses for the Ag-ZnO-2-2h sample to formaldehyde operated at 350 °C.
